# Supplementary material for: Computational Identification of Druggable Bioactive Compounds from Catharanthus roseus and Avicennia marina against Colorectal Cancer by Targeting Thymidylate Synthase
Source: MDPI journal article supplement (doi:10.3390/molecules27072089), 2022-03-24
Supplement: s1 [file s1]

## Computational Identification of Druggable Bioactive Compounds from *Catharanthus roseus* and *Avicennia marina* against Colorectal Cancer by Targeting Thymidylate Synthase

Md Rashedul Islam <sup>1,2,3</sup>, Md Abdul Awal <sup>4</sup>, Ahmed Khames <sup>5</sup>, Mohammad A. S. Abourehab <sup>6,7</sup>, Abdus Samad <sup>8,9</sup>, Walid M. I. Hassan <sup>1</sup>, Rahat Alam <sup>8,9</sup>, Osman I. Osman <sup>1</sup>, Suza Mohammad Nur <sup>4</sup>, Mohammad Habibur Rahman Molla <sup>10</sup>, Abdurashed O. Abdulrahman <sup>4,11</sup>, Sultana Rajia <sup>3,12</sup>, Foysal Ahammad <sup>9,10</sup>, Md Nazmul Hasan <sup>8,13,\*</sup>, Ishtiaq Qadri <sup>10,\*</sup> and Bonglee Kim <sup>14,15,\*</sup>

**Table S1:** A list of 63 compounds binding affinity (kcal/mol) with desire protein.

| Compound Name            | Binding Affinity |
|--------------------------|------------------|
| PubChem CID 71315502     | -17              |
| PubChem CID 28285721     | -10.7            |
| PubChem CID 1008512-18-2 | -10              |
| PubChem CID 225689       | -9               |
| PubChem CID 102004710    | -8.8             |
| PubChem CID 12303662     | -8.8             |
| PubChem CID 225688       | -8.8             |
| PubChem CID 95695-83-6   | -8.8             |
| PubChem CID 198912       | -8.7             |
| PubChem CID 11969465     | -8.7             |
| PubChem CID 157688       | -8.6             |
| PubChem CID 5281349      | -8.6             |
| PubChem CID 5316334      | -8.6             |
| PubChem CID 100933831    | -8.5             |
| PubChem CID 100933832    | -8.5             |
| PubChem CID 25109979     | -8.5             |
| CHEBI CID 69052          | -8.5             |
| PubChem CID 11646359     | -8.4             |
| PubChem CID 16219576     | -8.4             |
| CHEBI CID 69262          | -8.4             |
| CHEBI CID 132821         | -8.4             |
| PubChem CID 102399433    | -8.3             |
| PubChem CID 25109978     | -8.3             |
| PubChem CID C00024521    | -8.3             |
| CHEBI CID 69256          | -8.3             |
| CHEBI CID 69257          | -8.3             |
| PubChem CID 25109977     | -8.2             |
| PubChem CID 104380-51-0  | -8.1             |
| PubChem CID 12305664     | -8               |
| PubChem CID 197026       | -8               |
| ChemSpider CID 28288759  | -8               |
| CHEBI CID 69264          | -8               |
| PubChem CID 100953813    | -7.9             |
| PubChem CID 101686461    | -7.9             |
| PubChem CID 100925385    | -7.8             |
| PubChem CID 161115       | -7.8             |
| PubChem CID C00024497    | -7.8             |
| PubChem CID C00047645    | -7.8             |
| CHEBI ID 52126           | -7.8             |
| ChemSpider CID 21379030  | -7.6             |
| PubChem CID 2564-23-0    | -7.6             |
| CHEBI CID 69261          | -7.6             |
| ChemSpider CID 57619488  | -7.5             |
| PubChem CID 59706266     | -7.5             |

|                         |      |
|-------------------------|------|
| PubChem CID 327791      | -7.4 |
| PubChem CID C00025979   | -7.4 |
| CHEBI CID 69263         | -7.4 |
| CHEBI CID 49211         | -7.4 |
| PubChem CID 161300      | -7.3 |
| CHEBI CID 69259         | -7.1 |
| CHEBI CID 69265         | -7.1 |
| CHEBI CID 69258         | -6.7 |
| CHEBI CID 144380        | -6.4 |
| CHEBI CID 69260         | -6.1 |
| PubChem CID 107561      | -5.7 |
| PubChem CID 5460802     | -5.7 |
| PubChem CID 12300199    | -5.4 |
| PubChem CID 443158      | -5.2 |
| PubChem CID 6427789     | -4.9 |
| ChemSpider CID 23254674 | -4.5 |
| CHEBI CID 83546         | -4.5 |
| PubChem CID 145857      | -4.1 |
| PubChem CID 23725066    | -3.5 |

**Table S2:** ADME and PK properties of four selected compounds.

| Compound Name | Molecular weight (g/mol) | Heavy atoms | Aromatic heavy atoms | Rotable bonds | H-bond acceptors | H-bond donors | LogP(o/w) | LogS(ESOL) | GI absorption | Plasma protein binding |
|---------------|--------------------------|-------------|----------------------|---------------|------------------|---------------|-----------|------------|---------------|------------------------|
| CID:102004710 | 370.44                   | 27          | 9                    | 2             | 5                | 3             | 1.71      | -3.49      | high          | 0.859, 100%            |
| CID:198912    | 262.35                   | 20          | 15                   | 1             | 1                | 2             | 3.4       | -4.19      | high          | 0.903, 100%            |
| CID:11969465  | 400.51                   | 29          | 26                   | 1             | 5                | 2             | 3.14      | -3.99      | high          | 1.14, 100%             |
| CID:5281349   | 264.36                   | 20          | 9                    | 0             | 1                | 1             | 3.3       | -3.54      | high          | 0.918, 100%            |
