# Supplementary material for: Computational Identification of Druggable Bioactive Compounds from Catharanthus roseus and Avicennia marina against Colorectal Cancer by Targeting Thymidylate Synthase
Source: MDPI journal article supplement (doi:10.3390/molecules27072089), 2022-03-24
Supplement: s1 [file s1]

## Computational Identification of Druggable Bioactive Compounds from *Catharanthus roseus* and *Avicennia marina* against Colorectal Cancer by Targeting Thymidylate Synthase

Md Rashedul Islam <sup>1,2,3</sup>, Md Abdul Awal <sup>4</sup>, Ahmed Khames <sup>5</sup>, Mohammad A. S. Abourehab <sup>6,7</sup>, Abdus Samad <sup>8,9</sup>, Walid M. I. Hassan <sup>1</sup>, Rahat Alam <sup>8,9</sup>, Osman I. Osman <sup>1</sup>, Suza Mohammad Nur <sup>4</sup>, Mohammad Habibur Rahman Molla <sup>10</sup>, Abdurashed O. Abdulrahman <sup>4,11</sup>, Sultana Rajia <sup>3,12</sup>, Foysal Ahammad <sup>9,10</sup>, Md Nazmul Hasan <sup>8,13,\*</sup>, Ishtiaq Qadri <sup>10,\*</sup> and Bonglee Kim <sup>14,15,\*</sup>

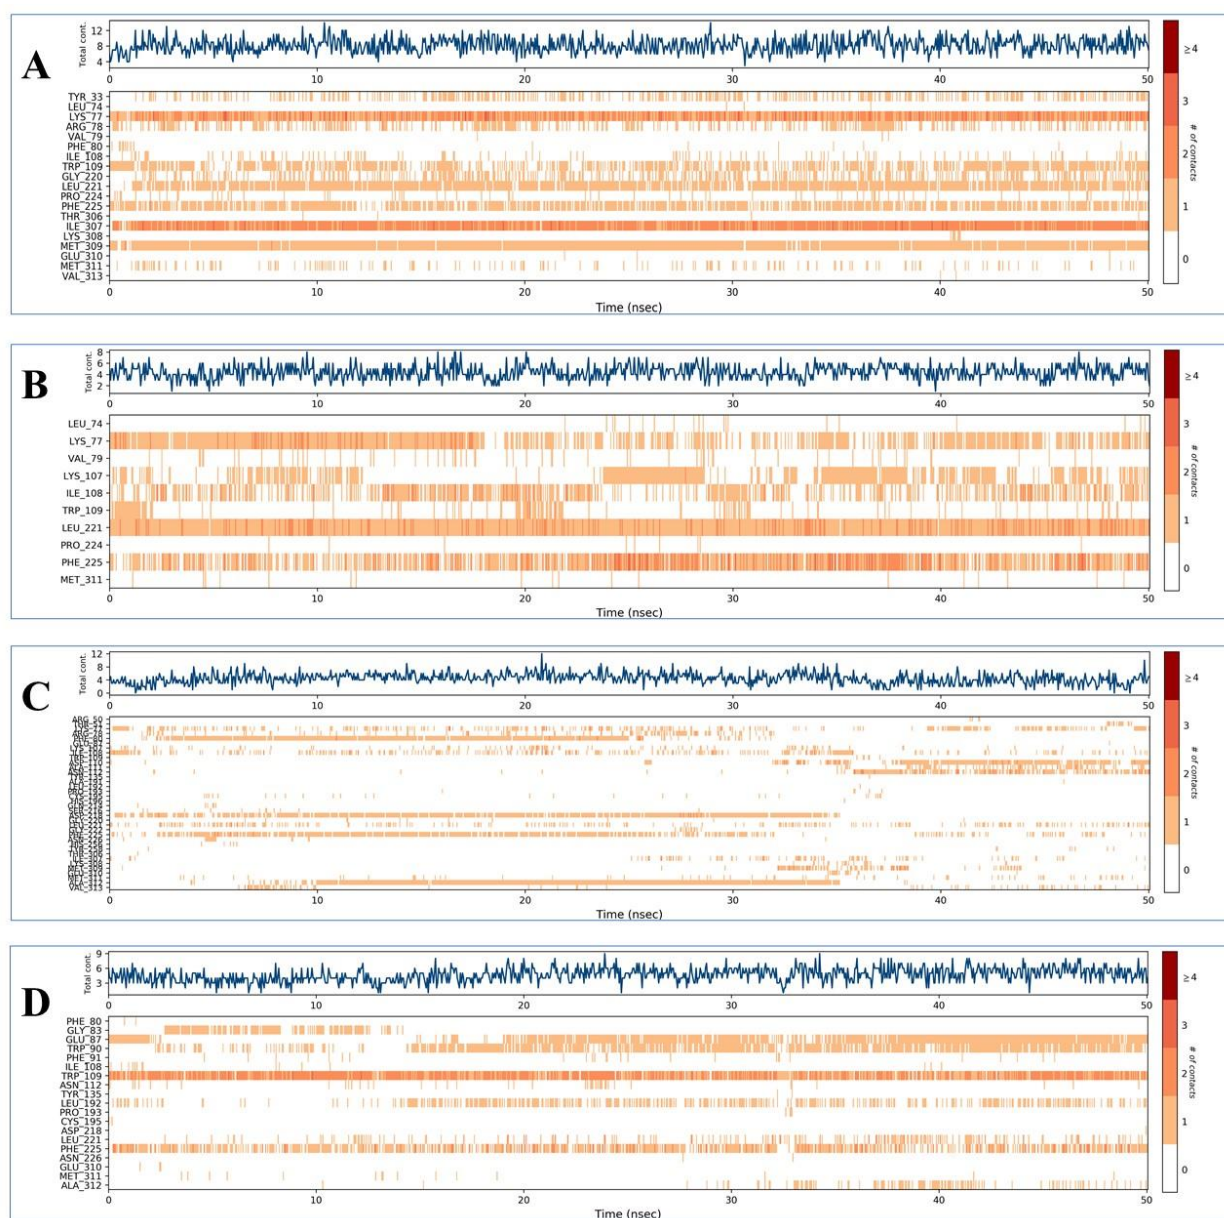

**Figure S1:** Showing the contact mapping of the protein-ligands interactions for the selected four compounds found during the 50 ns simulation run. Herein, showing the selected four ligands A. PubChem CID: 102004710, B. PubChem CID: 198912, C. PubChem CID: 11969465, and D. PubChem CID: 5281349 contact map with target protein.

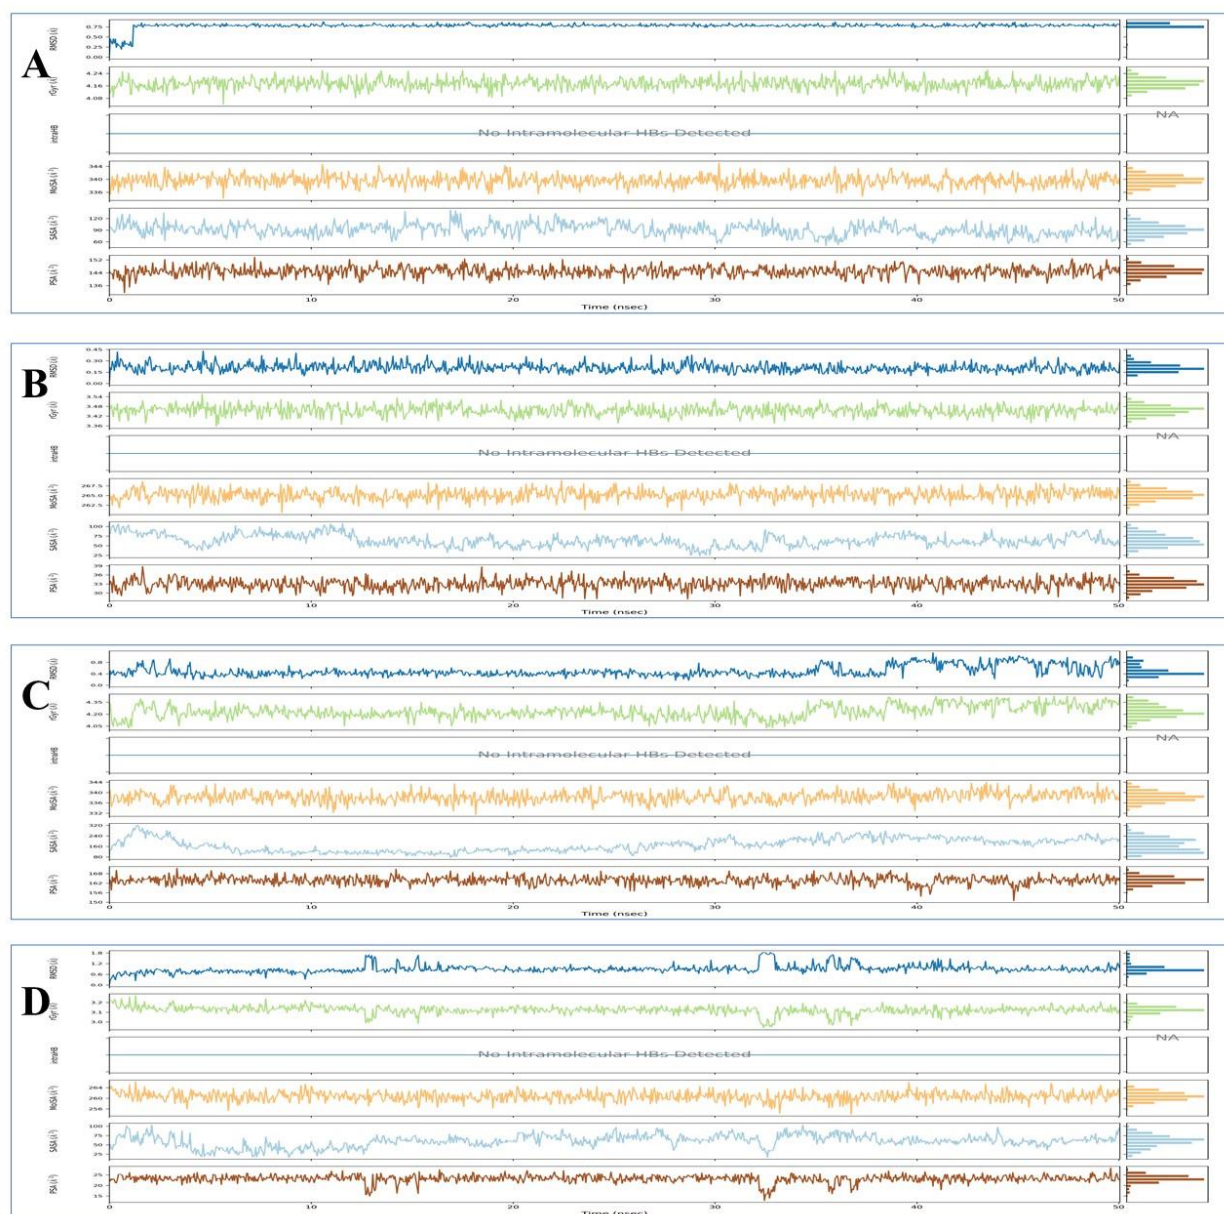

**Figure S2:** Depicted the RMSD (Å), rGyr (Å), intra-HB, MolSA(Å<sup>2</sup>), SASA(Å<sup>2</sup>), and PSA (Å<sup>2</sup>) of the selected four compounds in complex with TS protein. Herein, showing the value of the compounds A. PubChem CID: 102004710, B. PubChem CID: 198912, C. PubChem CID: 11969465, and D. PubChem CID: 5281349.

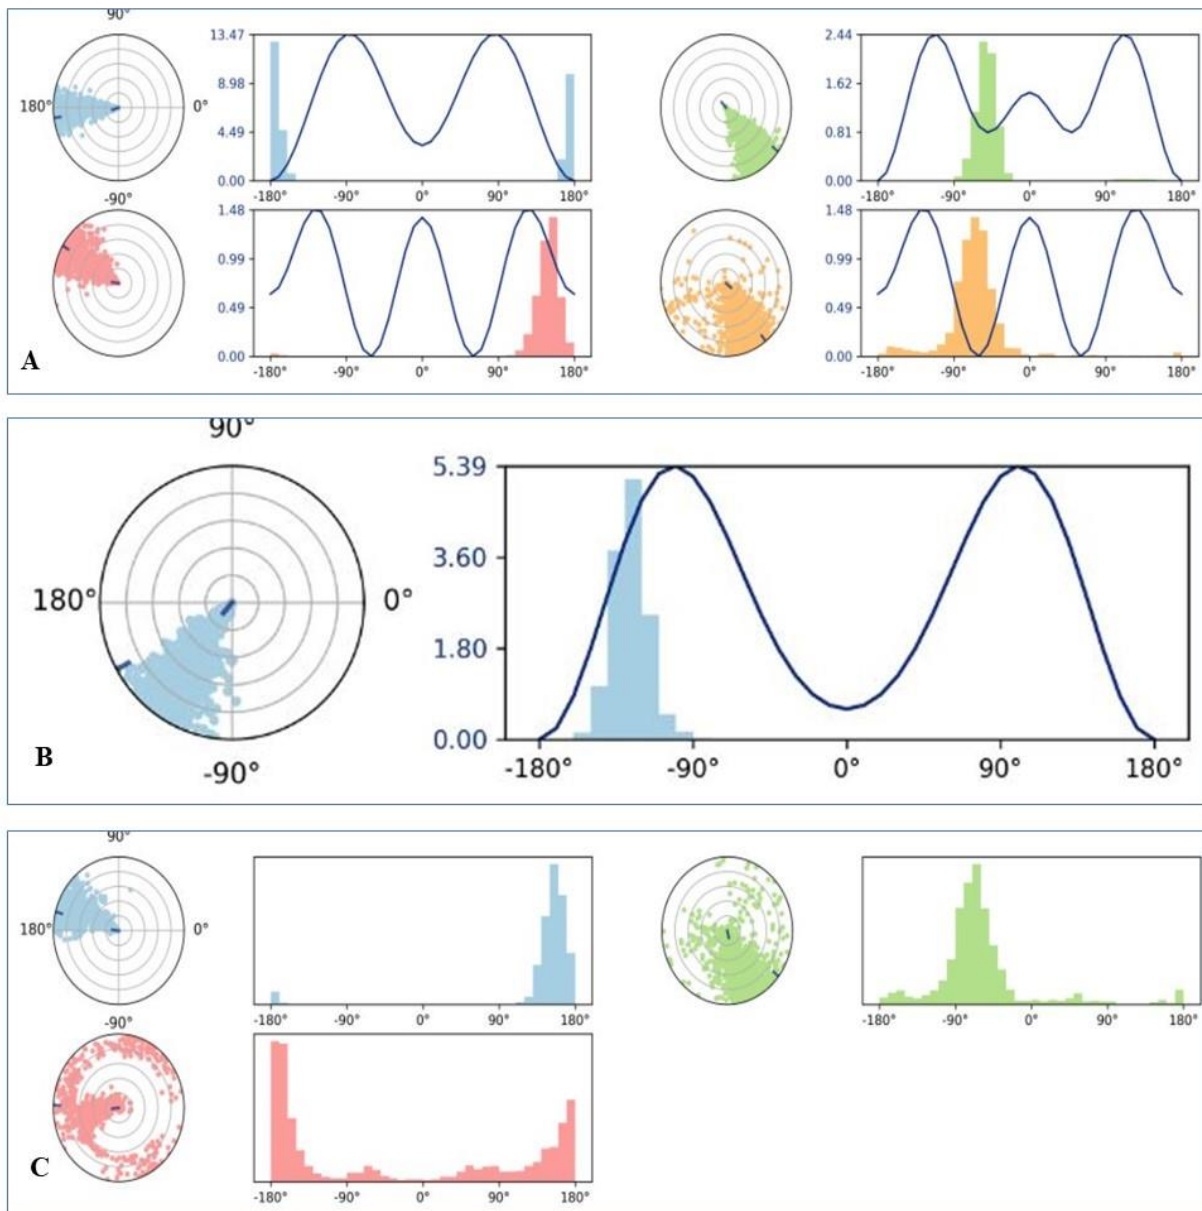

**Figure S3:** Depicted the torsion properties of the selected three compounds A. PubChem CID: 102004710, B. PubChem CID: 198912, C. PubChem CID: 11969465.
